# Supplementary material for: A New Species from the Canary Islands Increases the Diversity of the Red Algal Genus Pterocladiella in the Northeastern Atlantic
Source: MDPI journal article supplement (doi:10.3390/plants12020416), 2023-01-16
Supplement: s1 [file s1]

**Table S1.** List of publicly available sequences used in this study with GenBank accession numbers for both genes. Bold indicates sequence generated in the present study.

| Species                                   | State                               | <i>rbcL</i> | <i>cox1</i> | Reference |
|-------------------------------------------|-------------------------------------|-------------|-------------|-----------|
| <i>Pteroclatiella capillacea</i>          | China                               | MK987047    | MK987033    | [14]      |
| <i>Pteroclatiella capillacea</i>          | Spain                               | U01889      | *           | [5]       |
| <i>Pteroclatiella capillacea</i>          | Spain<br>(Canary<br>Islands)        | JN088219    | *           | [74]      |
| <i>Pteroclatiella beachiae</i>            | Brazil                              | KX555622    | KT208060    | [39]      |
| <i>Pteroclatiella australafricanensis</i> | Madagascar                          | KX557259    | KX557253    | [14]      |
| <i>Pteroclatiella caerulescens</i>        | South Africa                        | EF190246    | HQ412472    | [12]      |
| <i>Pteroclatiella caespitosa</i>          | South Africa                        | EF190243    | *           | [12]      |
| <i>Pteroclatiella maribagoensis</i>       | Philippines                         | KX077943    | KX077940    | [14]      |
| <i>Pteroclatiella caloglossoides</i>      | Australia                           | AY352422    | *           | [14]      |
| <i>Pteroclatiella caloglossoides</i>      | Peru                                | MF511710    | MF511707    | [14]      |
| <i>Pteroclatiella andresii</i>            | Chile                               | MF511709    | MF511706    | [14]      |
| <i>Pteroclatiella bartlettii</i>          | Rio do Fogo<br>Beach,<br>Maxarangua | KX555623    | KT208044    | [39]      |
| <i>Pteroclatiella musciformis</i>         | Costa Rica                          | KX423482    | *           | [14]      |
| <i>Pteroclatiella musciformis</i>         | China                               | *           | MK987036    | [16]      |
| <i>Pterocladia lucida</i>                 | New<br>Zealand                      | KT443961    | KT443929    | [14]      |
| <i>Pteroclatiella melanoidea</i>          | Spain                               | U01046      | *           | [5]       |
| <i>Pteroclatiella melanoidea</i>          | Italy                               | KT920279    | KT920404    | [14]      |
| <i>Pteroclatiella melanoidea</i>          | Portugal                            | *           | KJ179936    | [22]      |
| <i>Pteroclatiella melanoidea</i>          | France                              | *           | OL809739    | [19]      |
| <i>Pteroclatiella tenuis</i>              | Korea                               | GU731221    | *           | [14]      |
| <i>Pteroclatiella tenuis</i>              | Japan                               | *           | KT920406    | [14]      |
| <i>Pteroclatiella feldmannii</i>          | Madagascar                          | KX557262    | KX557256    | [14]      |
| <i>Pteroclatiella hamelii</i>             | Madagascar                          | KX557264    | KX557258    | [14]      |
| <i>Pteroclatiella media</i>               | Brazil                              | KT208132    | KT208091    | [14]      |
| <i>Pteroclatiella megasporangia</i>       | Malaysia                            | KC209065    | KC209087    | [14]      |

| Species                                        | State                         | <i>rbcL</i>     | <i>cox1</i>     | Reference         |
|------------------------------------------------|-------------------------------|-----------------|-----------------|-------------------|
| <i>Pterocladia luxurians</i>                   | USA                           | KX423475        | OL809726        | [14]; [19]        |
| <i>Pterocladia musciformis</i>                 | China                         | MK987062        | MK987036        | [14]              |
| <i>Pterocladia nana</i>                        | Korea                         | AB023840        | KX077941        | [14]              |
| <i>Pterocladia phangiae</i>                    | Malaysia                      | KC209078        | KC209090        | [14]              |
| <i>Pterocladia psammophila</i>                 | South Africa                  | EF190255        | HQ412483        | [14]              |
| <i>Aphanta pachyrrhiza</i>                     | Madagascar                    | KT920261        | KT920382        | [14]              |
| <i>Gelidium corneum</i>                        | Morocco                       | HM629821        | *               | [14]              |
| <i>Gelidium canariense</i>                     | Spain                         | GEACPRBCLC      | *               | [5]               |
| <i>Pterocladia</i> sp. 2                       | Sri Lanka                     | OL809940        | OL809756        | [19]              |
| <i>Pterocladia</i> sp. 3                       | Hawaii<br>(USA);<br>Indonesia | OL809942        | OL809757        | [19]              |
| <i>Pterocladia</i> sp. 4                       | Indonesia                     | OL809951        | OL809765        | [19]              |
| <i>Pterocladia</i> sp. 1                       | New<br>Caledonia              | LT969670        | OL809755        | [19]              |
| <i>Pterocladia</i> sp. 7                       | Vietnam                       | OL809954        | OL809770        | [19]              |
| <i>Pterocladia</i> sp. 8                       | Vietnam                       | OL809957        | OL809788        | [19]              |
| <i>Pterocladia</i> sp. 13                      | Vietnam                       | OL809961        | OL809798        | [19]              |
| <i>Pterocladia</i> sp. 6                       | Bermudas                      | OL809953        | OL809769        | [19]              |
| <i>Pterocladia</i> sp. 15                      | Oman                          | OL809964        | OL809801        | [19]              |
| <i>Pterocladia</i> sp. 10                      | Korea                         | OL809959        | OL809791        | [19]              |
| <i>Pterocladia</i> sp. 14                      | Canada;<br>USA                | OL809963        | OL809800        | [19]              |
| <i>Pterocladia bulbosa</i>                     | Hawaii<br>(USA)               | OL809924        | *               | [19]              |
| <i>Gelidiella calcicola</i>                    | N-France                      | OL828266        | OL809753        | [19]              |
| <i>Gelidiella feldmannii</i>                   | Africa                        | MK185782        | *               | [55]              |
| <i>Pterocladia xiae</i>                        | China                         | MZ098722        | MZ098708        | [17]              |
| <b><i>Pterocladia canariensis</i> sp. nov.</b> | <b>Spain</b>                  | <b>OQ216580</b> | <b>OQ247985</b> | <b>This study</b> |
